# Supplementary material for: Pan-cancer analysis of tumor metabolic landscape associated with genomic alterations
Source: Springer Nature journal article supplement (doi:10.1186/s12943-018-0895-9), 2018-10-17
Supplement: MOESM1 [file 16206856]

## **SUPPLEMENTARY MATERIALS**

### **Pan-cancer analysis of tumor metabolic landscape associated with genomic alterations**

**Materials and Methods**

**Supplementary Figures**

**Supplementary Tables**

**Supplementary References**

## **Materials and Methods**

### *Preprocessing for transcriptomic and genomic data of TCGA*

We used publicly available cancer genome and transcriptome data from the TCGA projects. Using ‘TCGABiolinks’ R package [1], we downloaded the level three RNA sequence data of 32 solid cancers from TCGA data portal (<https://portal.gdc.cancer.gov/>) on Dec 12th, 2017, obtained with Illumina HiSeq RNASeqV2 (Illumina, San Diego, CA, USA). For each type of TCGA projects, we normalized mRNA transcripts using ‘TCGAAnalyze\_Normalization’ function and filtered low expression genes with ‘TCGAanalyze\_Filtering’ function. We merged transcriptome data of each TCGA projects into one large-scale expression matrix for pan-cancer analysis. Clinical information, including vital status, follow-up time, and time of death was also collected in the same manner. The information for microsatellite instability (MSI) or hypermutated status of both STAD and COAD were downloaded from the website of The cBioPortal for Cancer Genomics (<http://www.cbioportal.org>) on Dec 23th, 2017. We downloaded pre-compiled, curated somatic mutations data of 32 solid cancer types from TCGA projects, provided by ‘TCGAmutations’, as a R data package (<https://github.com/PoisonAlien/TCGAmutations>). The pre-compiled data were derived from the latest analysis data (January 28<sup>th</sup>, 2016) which was downloaded via Broad Institute GDAC Firehose pipeline. Mutation data were analyzed and summarized using maftools package [2]. We excluded three cancer subtypes (malignant mesothelioma, uterine corpus endometrial carcinoma, and skin cutaneous melanoma) for the analysis due to insufficient mutation data in the pre-compiled data; conclusively, genomic and transcriptomic data from total 29 cancer subtypes were used for the analysis in the present study.

### *Calculating enrichment scores of metabolic pathways*

To analyze cancer type-specific metabolic landscape, we used 26 metabolic pathways defined by Reactome [3] across 29 cancer types. Single sample gene set enrichment analysis was then applied against the curated gene sets of the Reactome metabolic pathways to define metabolic profiles of each cancer samples. We implemented single sample gene set enrichment analysis [4] using the curated gene sets from canonical pathways (MSigDB C2, Broad Institute; version 3.0) with GSVA R/Bioconductor package [5, 6]. To identify the functional enrichment scores of metabolic pathways of each sample, we extracted the enrichment scores of 26 Reactome pathways which were related to metabolism (Supplementary table 1) [3]. The enrichment scores of Reactome metabolic pathways were normalized by z-score across all samples. In total, we analyzed 7648 transcriptomic and genomic data (Number of samples and abbreviation for each cancer type is summarized in Supplementary Table 2).

### *Two-dimensional metabolic landscape mapping*

To visualize differences in metabolic landscape, a dimension reduction method, t-Distributed Stochastic Neighbor Embedding (t-SNE), was used [7]. Briefly, using t-SNE, similar samples are modeled by nearby points to maintain local similarity. The similarity between a sample and other samples is defined by Gaussian with a number of neighbors, perplexity. We set the perplexity to 30.

### *Differentially mutated genes according to each metabolic pathway*

For each metabolic signatures, the samples of each tumor type were divided into two groups according to the median value of the enrichment score. The differentially mutated

genes between low and high enrichment scores group were evaluated by a fisher test on all genes. The genes with p-value corrected by false discovery rate under 0.05 were regarded as significantly differentially mutated genes.

#### *Cancer driver mutation*

We compared significantly differentially mutated genes for metabolic signatures and cancer drivers. Cancer drivers were identified by a pre-computed drivers using various algorithms deposited by DriverDBv2 (<http://driverdb.tms.cmu.edu.tw/driverdbv2/>) [8]. This database provides cancer drivers identified by multiple algorithms and we can choose the number of algorithms to find duplicate driver genes. We chose the maximal number of computational algorithms for each cancer type to define cancer drivers.

#### *Statistical analysis*

The correlation analysis between the TMB and enrichment scores of metabolic pathways was performed by the Spearman's correlation test. The prognostic property of each enrichment score of metabolic pathways on overall survival was evaluated by using the Cox proportional regression analysis in each cancer subtypes as well as pan-cancer data. All statistical analyses were done within the R program (v3.4.3).

## Supplementary Figures

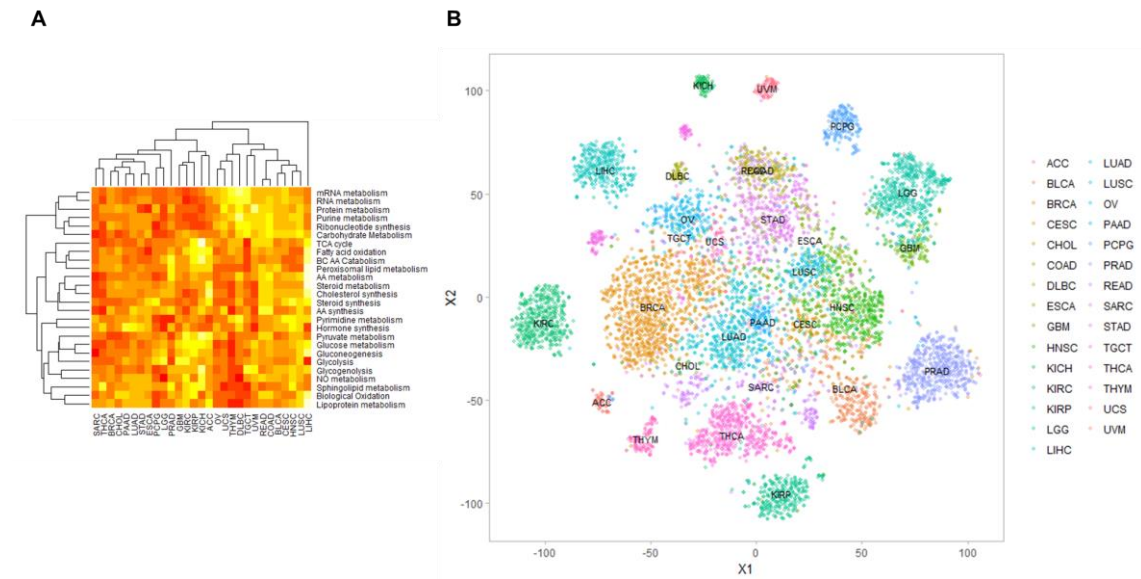

**Supplementary Figure 1. Metabolic landscape of 29 types of cancer.** (A) The heatmap depicting the median enrichment scores of 26 Reactome metabolic pathways for each cancer type. Red, yellow color represents high, low enrichment scores, respectively. (B) All samples were mapped to the two-dimensional projection using t-Distributed Stochastic Neighborhood Embedding based on the enrichment scores of metabolic pathways. Each cancer type is depicted in different color.

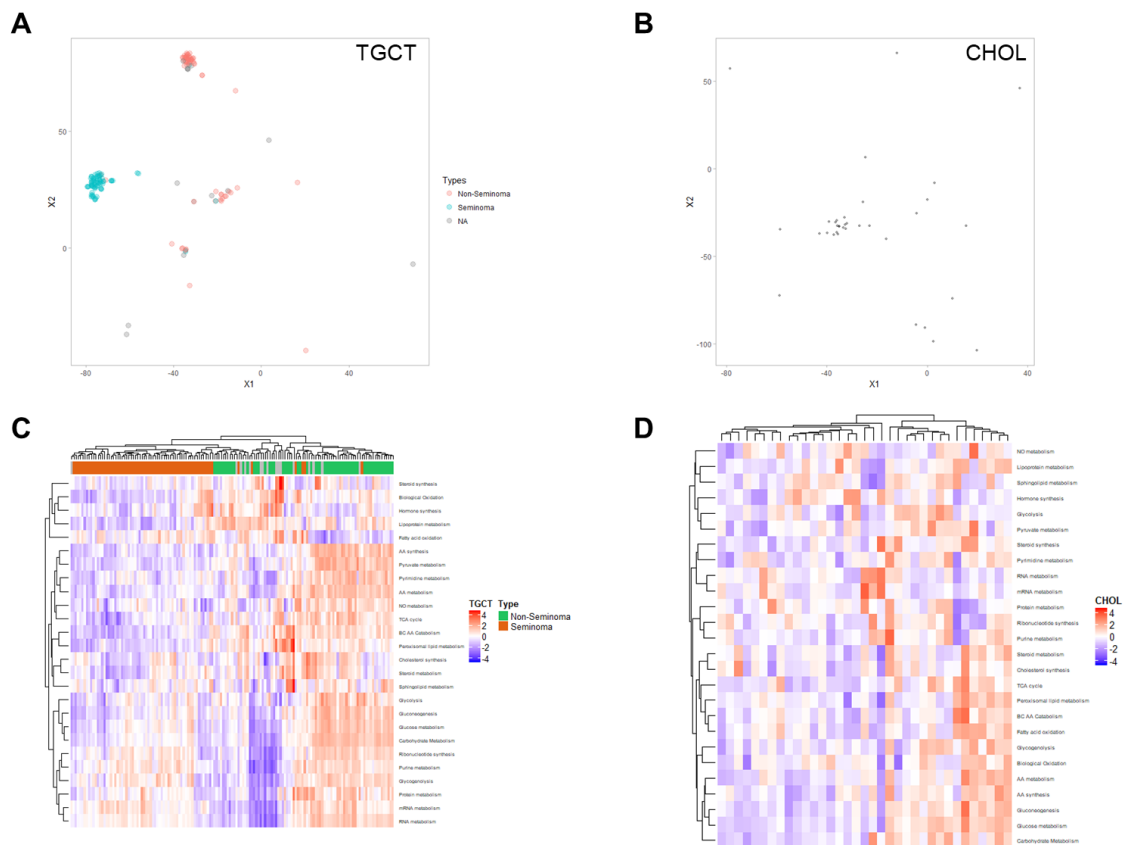

**Supplementary Figure 2. Metabolic landscape of testicular germ cell tumor (TCGT) and cholangiocarcinoma (CHOL).** (A, B) t-Distributed Stochastic Neighbor Embedding analysis of TCGT (A) and CHOL (B) data sets relative to metabolic signatures. (C, D) The heatmap depicting metabolic signatures of TCGT (C) and CHOL (D). The histologic types of testicular germ cell tumor are shown for each sample (above the heatmap).

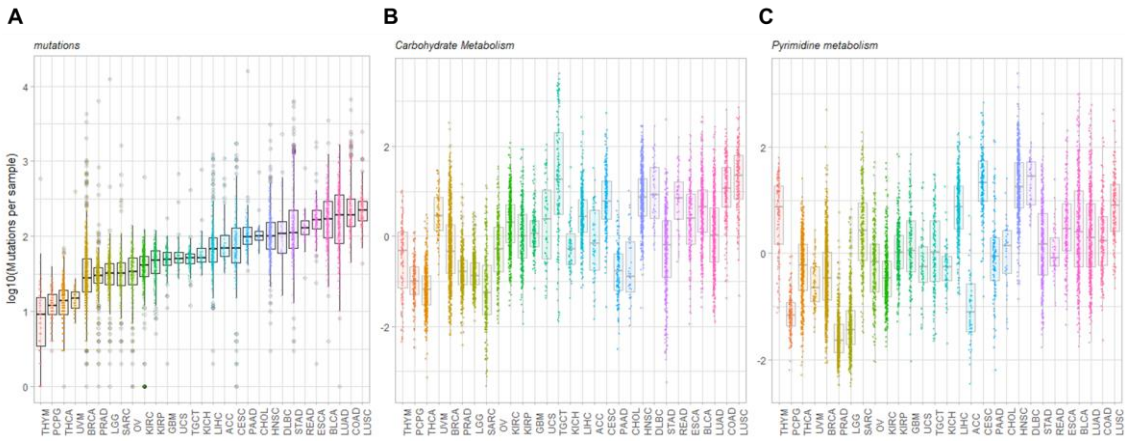

**Supplementary Figure 3. Distribution of total mutation burden carbohydrate, and pyrimidine metabolism in each cancer type. Total mutation burden (A), enrichment scores of carbohydrate (B) and pyrimidine metabolism (C) across 29 cancers.**

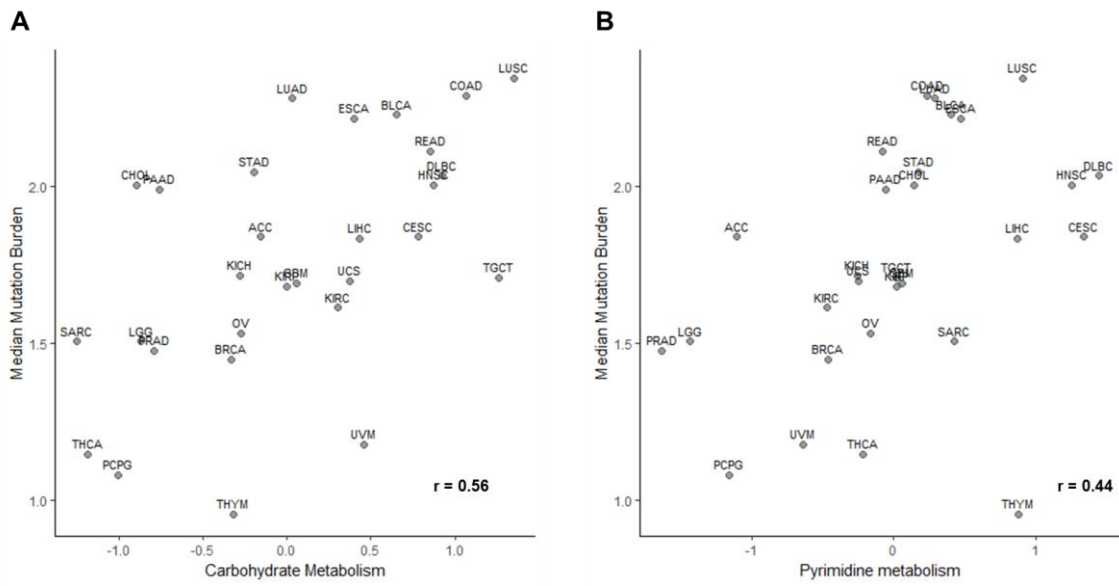

**Supplementary Figure 4. Association between total mutation burden and carbohydrate, pyrimidine metabolism.** The points of scatter plot representing the median value of total mutation burden of each cancer type (y-axis) and carbohydrate (A), and pyrimidine (B) metabolism (x-axis). The correlation coefficient (r value) for each plot was calculated from pan-cancer analysis.



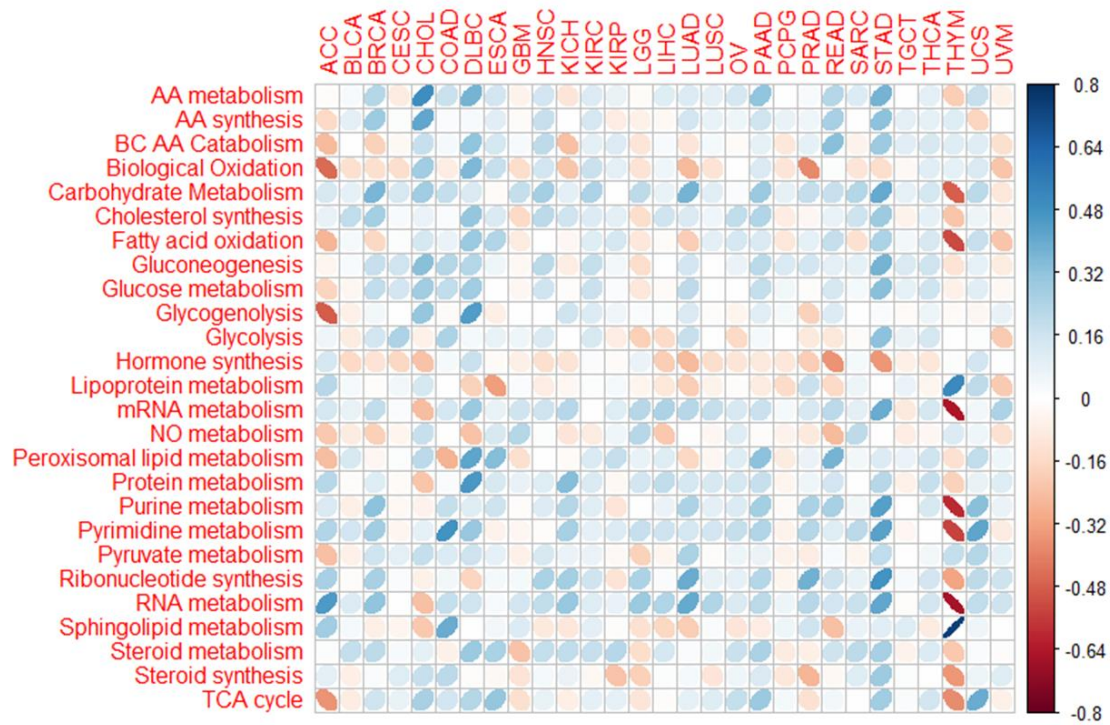

**Supplementary Figure 5. Correlation of the enrichment scores of metabolic pathways and tumor mutation burden across 29 cancers.** The Spearman's rank correlation matrix representing the relationship between enrichment scores of 26 metabolic pathways from Reactome and tumor mutation burden across 29 cancers. The colors of the scale bar denote the nature of the correlation with positive correlation in blue scale and negative correlation in red scale. The ellipses have their eccentricity parametrically scaled to the correlation coefficient value.



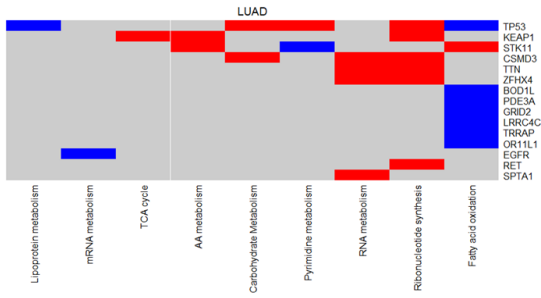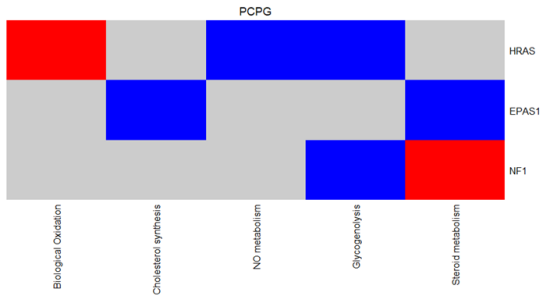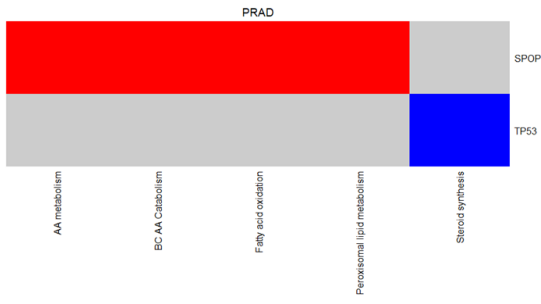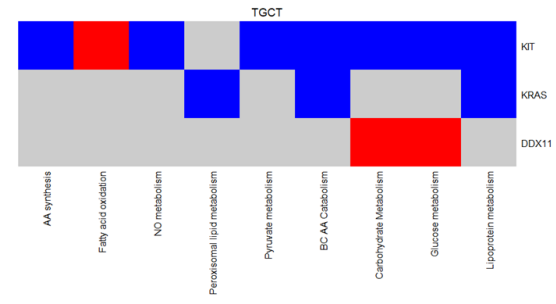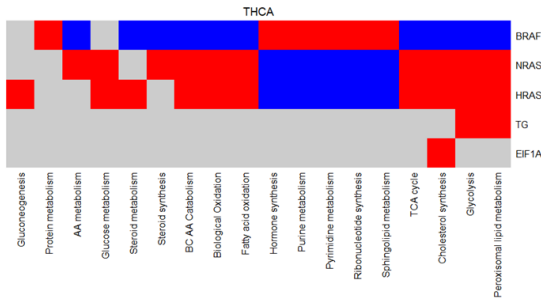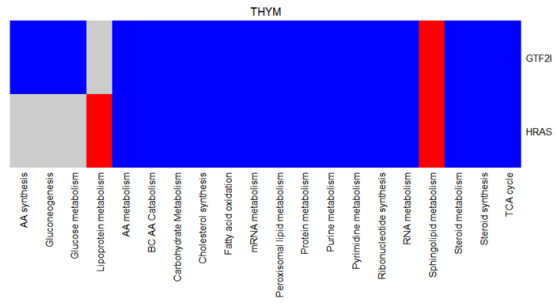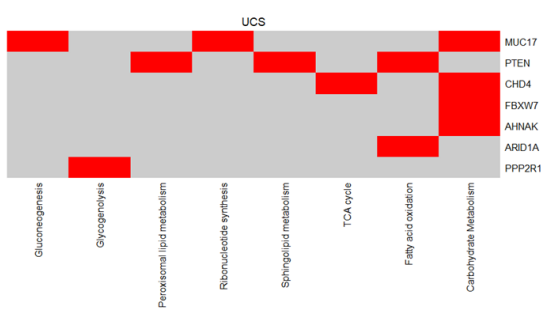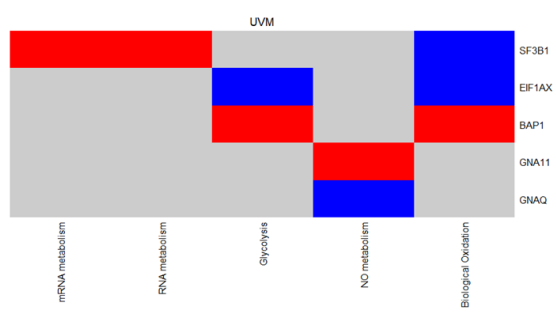

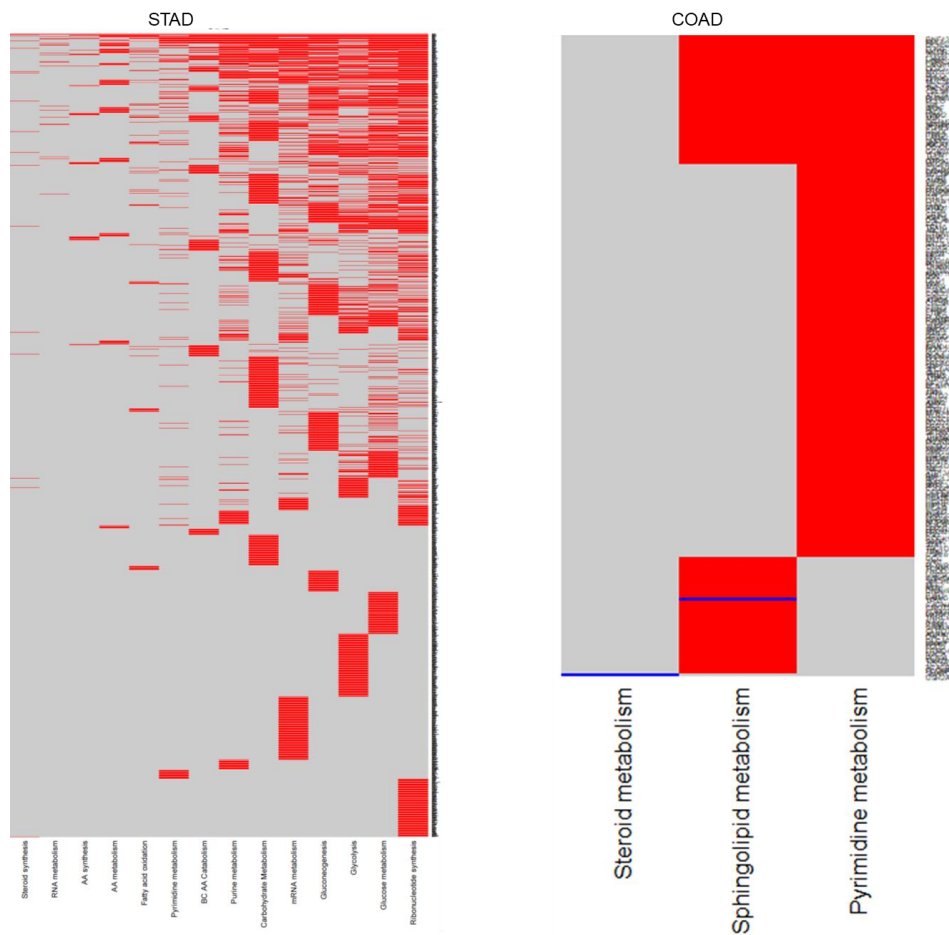

**Supplementary Figure 6. Metabolism-related genes for each cancer type.** All

metabolism-related genes (y-axis) are presented with metabolic signatures (x-axis) for each cancer type. Red squares represent genes significantly more mutations in tumors with high metabolic signatures. Blue squares represent genes significantly fewer mutations in tumor with high metabolic signature.

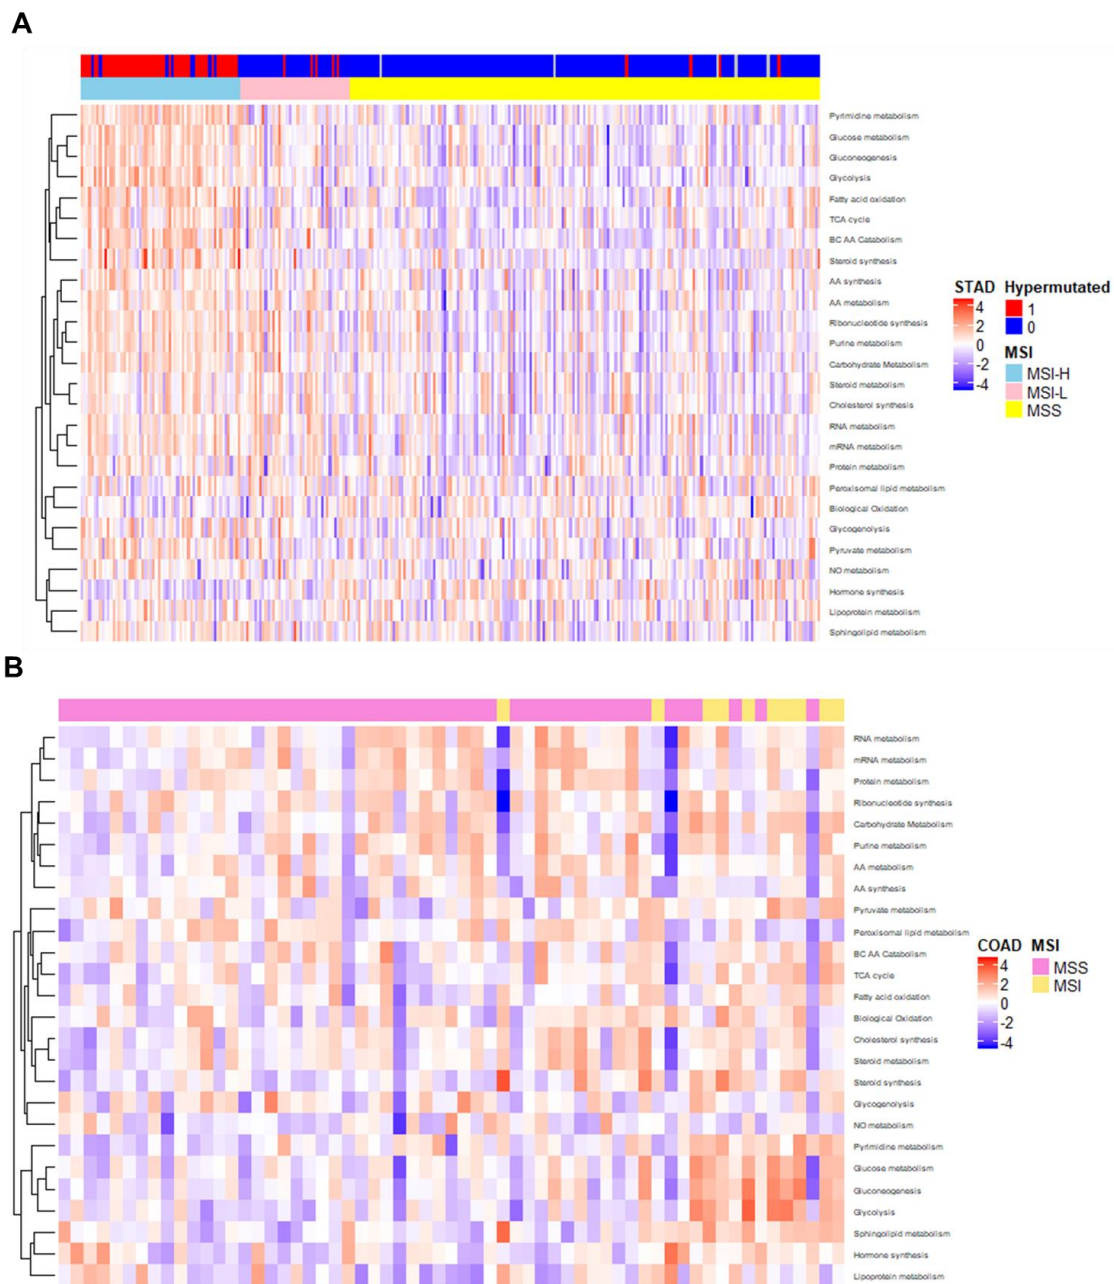

**Supplementary Figure 7. Difference in metabolic signatures according to the presence of microsatellite instability.** The heatmap depicting metabolic signatures of stomach adenocarcinoma (STAD) (A) and colon adenocarcinoma (COAD) (B). The presence of microsatellite instability or hypermutation are shown above the heatmap (MSS =

microsatellite stable; MSI = microsatellite instable; MSI-H = High microsatellite instability; MSI-L = Low microsatellite instability).

## Supplementary Tables

**Supplementary Table 1. List of metabolic pathways from Reactome used in the study**

| <b>Metabolic pathways from Reactome</b>          | <b>Abbreviation</b>          |
|--------------------------------------------------|------------------------------|
| Metabolism of amino acids                        | AA metabolism                |
| Amino acid synthesis and interconversion         | AA synthesis                 |
| Branched chain amino acid catabolism             | BC AA Catabolism             |
| Biological oxidations                            | Biological Oxidation         |
| Metabolism of carbohydrates                      | Carbohydrate Metabolism      |
| Cholesterol biosynthesis                         | Cholesterol synthesis        |
| Mitochondrial fatty acid beta oxidation          | Fatty acid oxidation         |
| Glyconeogenesis                                  | Gluconeogenesis              |
| Glucose metabolism                               | Glucose metabolism           |
| Glycogen breakdown glycogenolysis                | Glycogenolysis               |
| Glycolysis                                       | Glycolysis                   |
| Hormone synthesis                                | Hormone synthesis            |
| Lipoprotein metabolism                           | Lipoprotein metabolism       |
| Metabolism of mRNA                               | mRNA metabolism              |
| Metabolism of nitric oxide                       | NO metabolism                |
| Peroxisomal lipid metabolism                     | Peroxisomal lipid metabolism |
| Metabolism of proteins                           | Protein metabolism           |
| Purine metabolism                                | Purine metabolism            |
| Pyrimidine metabolism                            | Pyrimidine metabolism        |
| Pyruvate metabolism                              | Pyruvate metabolism          |
| Purine ribonucleotide monophosphate biosynthesis | Ribonucleotide synthesis     |
| Metabolism of RNA                                | RNA metabolism               |
| Sphingolipid metabolism                          | Sphingolipid metabolism      |
| Steroid metabolism                               | Steroid metabolism           |
| Steroid hormone biosynthesis                     | Steroid synthesis            |
| Citric acid cycle                                | TCA cycle                    |

**Supplementary Table 2. Number of samples for each cancer subtype included for the analysis**

| <b>Disease type</b>                                                 | <b>Abbreviation</b> | <b>Number of samples</b> |
|---------------------------------------------------------------------|---------------------|--------------------------|
| Adenocortical carcinoma                                             | ACC                 | 54                       |
| Bladder Urothelial Carcinoma                                        | BLCA                | 390                      |
| Breast invasive carcinoma                                           | BRCA                | 971                      |
| Cervical Squamous Cell Carcinoma<br>and Endocervical Adenocarcinoma | CESC                | 193                      |
| Cholangiocarcinoma                                                  | CHOL                | 35                       |
| Colon Adenocarcinoma                                                | COAD                | 208                      |
| Diffuse large B-cell lymphoma                                       | DLBC                | 48                       |
| Esophageal Carcinoma                                                | ESCA                | 184                      |
| Glioblastoma multiforme                                             | GBM                 | 142                      |
| Head and Neck Squamous Cell Carcinoma                               | HNSC                | 503                      |
| Kidney Chromophobe                                                  | KICH                | 66                       |
| Kidney Renal Clear Cell Carcinoma                                   | KIRC                | 433                      |
| Kidney Renal Papillary Cell Carcinoma                               | KIRP                | 281                      |
| Brain lower grade glioma                                            | LGG                 | 516                      |
| Liver Hepatocellular Carcinoma                                      | LIHC                | 367                      |
| Lung Adenocarcinoma                                                 | LUAD                | 478                      |
| Lung squamous cell carcinoma                                        | LUSC                | 176                      |
| Ovarian serous cystadenocarcinoma                                   | OV                  | 248                      |
| Pancreatic Adenocarcinoma                                           | PAAD                | 119                      |
| Pheochromocytoma and Paraganglioma                                  | PCPG                | 179                      |
| Prostate Adenocarcinoma                                             | PRAD                | 497                      |
| Rectum adenocarcinoma                                               | READ                | 53                       |
| Sarcoma                                                             | SARC                | 245                      |
| Stomach Adenocarcinoma                                              | STAD                | 370                      |
| Testicular germ cell tumors                                         | TGCT                | 147                      |
| Thyroid carcinoma                                                   | THCA                | 493                      |
| Thymoma                                                             | THYM                | 115                      |
| Uterine Carcinosarcoma                                              | UCS                 | 57                       |
| Uveal melanoma                                                      | UVM                 | 80                       |



## SUPPLEMENTARY REFERENCES

1. Colaprico A, Silva TC, Olsen C, Garofano L, Cava C, Garolini D, Sabedot TS, Malta TM, Pagnotta SM, Castiglioni I: **TCGAbiolinks: an R/Bioconductor package for integrative analysis of TCGA data.** *Nucleic acids research* 2015, **44**:e71-e71.
2. Mayakonda A, Koeffler HP: **Maftools: Efficient analysis, visualization and summarization of MAF files from large-scale cohort based cancer studies.** *BioRxiv* 2016:052662.
3. Croft D, Mundo AF, Haw R, Milacic M, Weiser J, Wu G, Caudy M, Garapati P, Gillespie M, Kamdar MR: **The Reactome pathway knowledgebase.** *Nucleic acids research* 2013, **42**:D472-D477.
4. Barbie DA, Tamayo P, Boehm JS, Kim SY, Moody SE, Dunn IF, Schinzel AC, Sandy P, Meylan E, Scholl C: **Systematic RNA interference reveals that oncogenic KRAS-driven cancers require TBK1.** *Nature* 2009, **462**:108.
5. Liberzon A, Subramanian A, Pinchback R, Thorvaldsdóttir H, Tamayo P, Mesirov JP: **Molecular signatures database (MSigDB) 3.0.** *Bioinformatics* 2011, **27**:1739-1740.
6. Hänzelmann S, Castelo R, Guinney J: **GSEA: gene set variation analysis for microarray and RNA-seq data.** *BMC bioinformatics* 2013, **14**:7.
7. Maaten Lvd, Hinton G: **Visualizing data using t-SNE.** *Journal of machine learning research* 2008, **9**:2579-2605.
8. Chung I-F, Chen C-Y, Su S-C, Li C-Y, Wu K-J, Wang H-W, Cheng W-C: **DriverDBv2: a database for human cancer driver gene research.** *Nucleic acids research* 2015, **44**:D975-D979.
